# Supplementary material for: Effective elimination of As(iii)viasimultaneous photocatalytic oxidation and adsorption by a bifunctional cake-like TiO2derived from MIL-125(Ti)
Source: Royal Society of Chemistry journal article supplement (doi:10.1039/c8cy00125a), 2018-01-01
Supplement: c8cy00125a1.pdf [file c8cy00125a1.pdf]

**Effective elimination of As(III) via simultaneous photocatalytic  
oxidation and adsorption by a bifunctional cake-like TiO<sub>2</sub>  
derived from MIL-125(Ti)  
Supporting Information**

**Table S1** BET special surface areas ( $S_{\text{BET}}$ ), pore volumes ( $V_{\text{p}}$ ) and average pore sizes  
of the samples.

| Samples           | $S_{\text{BET}}$ (m <sup>2</sup> g <sup>-1</sup> ) | $V_{\text{p}}$ (cm <sup>3</sup> g <sup>-1</sup> ) | Average pore size (nm) |
|-------------------|----------------------------------------------------|---------------------------------------------------|------------------------|
| MIL-125(Ti)-280°C | 816.1                                              | 0.54                                              | 7.6                    |
| MIL-125(Ti)-380°C | 114.9                                              | 0.27                                              | 9.5                    |
| MIL-125(Ti)-480°C | 40.8                                               | 0.13                                              | 12.6                   |
| MIL-125(Ti)-580°C | 32.5                                               | 0.12                                              | 16.2                   |

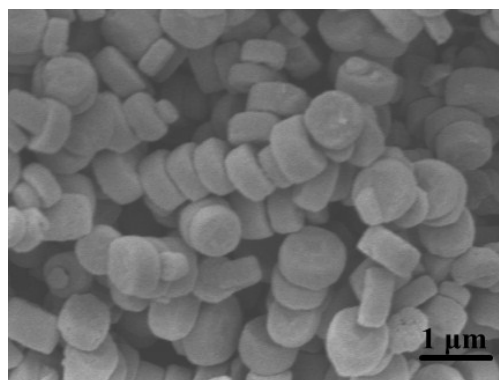

**Fig. S1.** SEM images of MIL-125(Ti).

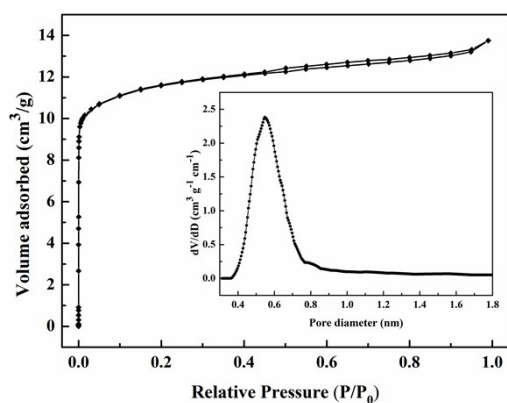

**Fig. S2.** N<sub>2</sub> adsorption-desorption isotherms and pore size distribution curves (insets) of MIL-125(Ti).

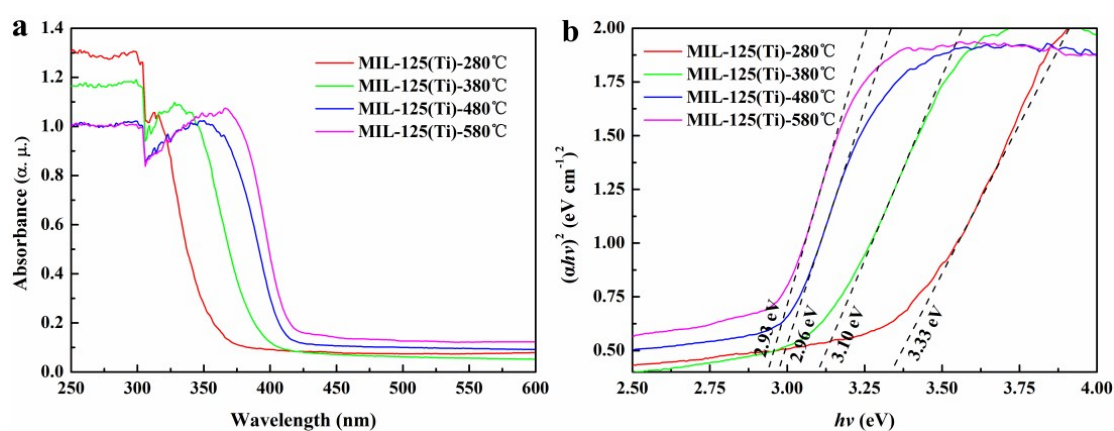

**Fig. S3.** UV-vis absorption spectra and (a) and plots of  $(ah\nu)^2$  versus  $h\nu$  of samples (b) of the MIL-125(Ti)-280°C, MIL-125(Ti)-380°C, MIL-125(Ti)-480°C and MIL-125(Ti)-580°C.

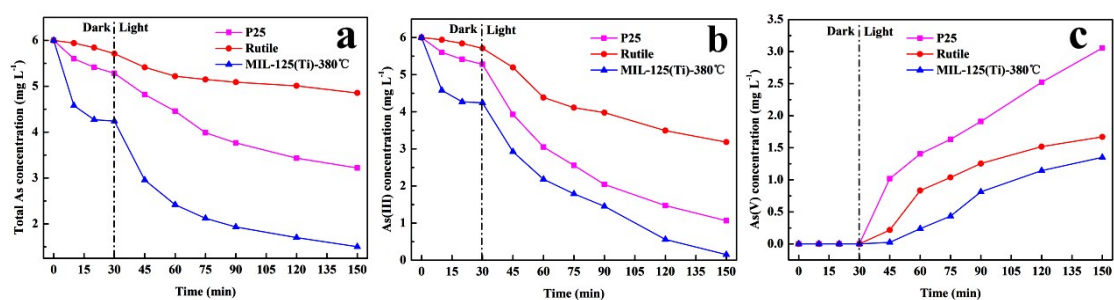

**Fig. S4.** Photocatalytic oxidation of As(III) by comparing P25, Rutile and MIL-125(Ti)-380°C under UV light irradiation. The concentration of total As (a), As(III) (b) and As(V) (c).

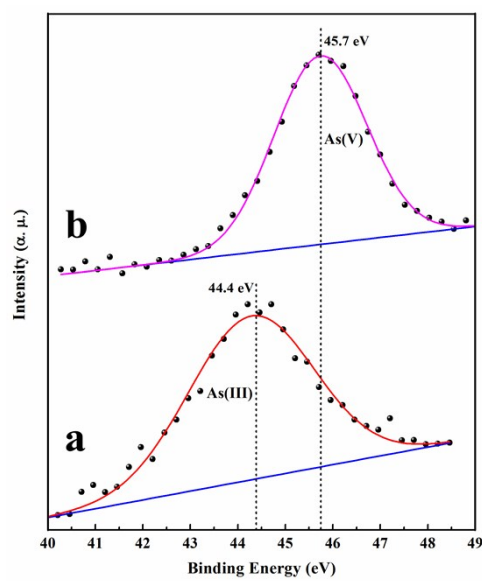

**Fig. S5.** XPS spectra of As 3d: (a) after adsorption of As(III) under dark and (b) after photocatalytic oxidation of As(III) under UV light.
